# Supplementary material for: Associations between lipids in selected brain regions, plasma miRNA, and behavioral and cognitive measures following 28Si ion irradiation
Source: PubMed Central journal article supplement (PMC8295277; doi:10.1038/s41598-021-93869-3), 2021-07-21
Supplement: 41598_2021_93869_MOESM9_ESM.pdf [file 41598_2021_93869_MOESM9_ESM.pdf]

# INGENUITY<sup>®</sup>

## PATHWAY ANALYSIS

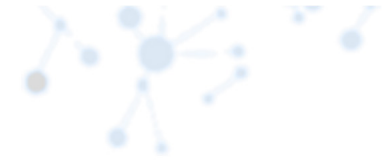

Analysis Name: x451\_305\_A - 2020-11-20 05:01 PM

Analysis Creation Date: 2020-11-20

Build version: exported

Content version: 57662101 (Release Date: 2020-09-15)

### Experiment Metadata

| Name | Value |
|------|-------|
|------|-------|

### Analysis Settings

### Top Canonical Pathways

### Top Upstream Regulators

### Top Diseases and Bio Functions

### Diseases and Disorders

| Name                                       | p-value range       | # Molecules |
|--------------------------------------------|---------------------|-------------|
| <b>Organismal Injury and Abnormalities</b> | 4.71E-02 - 6.20E-21 | 54          |
| <b>Reproductive System Disease</b>         | 2.77E-02 - 6.20E-21 | 38          |
| <b>Psychological Disorders</b>             | 1.57E-02 - 1.89E-17 | 26          |
| <b>Neurological Disease</b>                | 3.01E-02 - 4.09E-17 | 31          |
| <b>Cancer</b>                              | 4.63E-02 - 4.70E-16 | 45          |

### **Molecular and Cellular Functions**

| Name                                     | p-value range       | # Molecules |
|------------------------------------------|---------------------|-------------|
| <b>Cellular Development</b>              | 4.51E-02 - 3.67E-07 | 36          |
| <b>Cellular Growth and Proliferation</b> | 4.51E-02 - 3.67E-07 | 31          |
| <b>Cell Cycle</b>                        | 4.61E-02 - 3.78E-07 | 12          |
| <b>Cellular Movement</b>                 | 4.61E-02 - 1.86E-05 | 20          |
| <b>Cell Death and Survival</b>           | 4.24E-02 - 3.15E-04 | 18          |

### **Physiological System Development and Function**

| Name                                              | p-value range       | # Molecules |
|---------------------------------------------------|---------------------|-------------|
| <b>Embryonic Development</b>                      | 4.61E-02 - 3.78E-07 | 10          |
| <b>Digestive System Development and Function</b>  | 5.22E-07 - 5.22E-07 | 5           |
| <b>Hepatic System Development and Function</b>    | 5.22E-07 - 5.22E-07 | 5           |
| <b>Organ Development</b>                          | 4.51E-02 - 5.22E-07 | 7           |
| <b>Connective Tissue Development and Function</b> | 3.81E-02 - 3.30E-06 | 12          |

**Top Tox Functions****Cardiotoxicity**

| Name                            | p-value range       | # Molecules |
|---------------------------------|---------------------|-------------|
| <b>Cardiac Dilation</b>         | 3.49E-06 - 3.49E-06 | 9           |
| <b>Cardiac Enlargement</b>      | 1.61E-01 - 3.49E-06 | 10          |
| <b>Cardiac Regeneration</b>     | 3.81E-02 - 3.81E-02 | 1           |
| <b>Cardiac Proliferation</b>    | 4.51E-02 - 4.35E-02 | 2           |
| <b>Congenital Heart Anomaly</b> | 7.74E-02 - 7.74E-02 | 1           |

**Hepatotoxicity**

| Name                                        | p-value range       | # Molecules |
|---------------------------------------------|---------------------|-------------|
| <b>Liver Inflammation/Hepatitis</b>         | 5.22E-07 - 5.22E-07 | 5           |
| <b>Liver Cirrhosis</b>                      | 7.07E-04 - 5.99E-05 | 7           |
| <b>Liver Fibrosis</b>                       | 1.51E-01 - 7.07E-04 | 5           |
| <b>Liver Steatosis</b>                      | 7.64E-03 - 7.64E-03 | 3           |
| <b>Liver Hyperplasia/Hyperproliferation</b> | 4.11E-01 - 8.29E-03 | 21          |

**Nephrotoxicity**

| Name                             | p-value range       | # Molecules |
|----------------------------------|---------------------|-------------|
| <b>Glomerular Injury</b>         | 9.79E-13 - 9.79E-13 | 10          |
| <b>Renal Inflammation</b>        | 9.79E-13 - 9.79E-13 | 10          |
| <b>Renal Nephritis</b>           | 9.79E-13 - 9.79E-13 | 10          |
| <b>Renal Necrosis/Cell Death</b> | 5.69E-01 - 2.19E-01 | 2           |

## Top Regulator Effect Networks

## Top Networks

| ID       | Associated Network Functions                                                                   | Score |
|----------|------------------------------------------------------------------------------------------------|-------|
| <b>1</b> | Organismal Injury and Abnormalities, Reproductive System Disease, Psychological Disorders      | 26    |
| <b>2</b> | Connective Tissue Disorders, Inflammatory Disease, Organismal Injury and Abnormalities         | 26    |
| <b>3</b> | Cell Cycle, Embryonic Development, Cellular Development                                        | 20    |
| <b>4</b> | Skeletal and Muscular System Development and Function, Tissue Morphology, Inflammatory Disease | 20    |

|   |                                                                                                |    |
|---|------------------------------------------------------------------------------------------------|----|
| 5 | Neurological Disease,<br>Organismal Injury and<br>Abnormalities,<br>Psychological<br>Disorders | 18 |
|---|------------------------------------------------------------------------------------------------|----|

### Top Tox Lists

| Name                                                                                             | p-value  | Overlap     |
|--------------------------------------------------------------------------------------------------|----------|-------------|
| <a href="#">Renal Ischemia-Reperfusion Injury<br/>MicroRNA Biomarker Panel (Mouse)</a>           | 2.20E-02 | 12.5 % 1/8  |
| <a href="#">Decreases Transmembrane Potential of<br/>Mitochondria and Mitochondrial Membrane</a> | 3.08E-01 | 0.8 % 1/132 |

### Top My Lists

### Top My Pathways

### Top Analysis-Ready Molecules
